# Supplementary material for: UNC-6/Netrin promotes both adhesion and directed growth within a single axon
Source: eLife. 2025 Mar 7;13:RP100424. doi: 10.7554/eLife.100424 (PMC11888602; doi:10.7554/eLife.100424)
Supplement: Figure 2—source data 1. [file elife-100424-fig2-data1.xlsx]

## Sheet: Figure 2B
Percent of Axons that Stabilize at vSLNC after Initial Contact
	gentoype	Percent	SE
	wildtype	0.8696	0.07
	unc-6(ev400)	0.5	0.119
	unc-40(e1430)	0.4762	0.109

## Sheet: Figure 2D
		UNC-40::GFP Intensity normalized to t=0
time (min) relative to vSLNC contact		wildtype								unc-6(ev400)
	-15	0.357143	0.666667		0.444444	1	1.5	1.25	0.142857	0.6875		1.875	0.714286	1.44444	0.75	0.444444	0.5
	-12	0.142857	0.555556		0.444444	1	1.25	0.5	0.571429	0.375	2.25	1.125	0.5	1	1.25	0.444444	0.571429
	-9	0.214286	0.777778	1.14286	0.333333	0.75	1.25	0.875	1	0.625	1.125	0.625	0.357143	1.88889	1	0.666667	1.14286
	-6	0.428571	1.11111	1.14286	0.555556	1.75	1	0.75	1	0.8125	1.375	0.625	0.571429	0.888889	1	0.777778	0.5
	-3	0.571429	0.888889	0.714286	0.777778	1.75	1.5	1.125	0.714286	0.6875	1	0.625	0.357143	0.666667	1.625	0.611111	0.785714
	0	1	1	1	1	1	1	1	1	1	1	1	1	1	1	1	1
	3	1.21429	2.11111	1.71429	1.77778	2.25	4	2.5	1.28571	0.5625	0.75	0.75	0.5	0.666667	1.75	0.888889	0.714286
	6	0.5	2.55556	2.42857	1.44444	3.25	6.25	1.5	2.42857	0.6875	0.625	0.625	0.714286	1.33333	2	0.722222	0.642857
	9	1.42857	1.77778	1.42857	2.22222	3.5	5	2.25	2	0.6875	0.75	0.875	0.428571	1.33333	1	0.444444	0.5
	12	0.785714	1.88889	2.85714	1.33333	3.75	4.25	3.25	2	0.4375	3.25	0.625	0.642857	1.77778	0.75	0.333333	0.428571
	15	0.857143	2.44444	2		4.5	4.25	1.625	2	0.9375	1.625	1.125	0.785714	0.666667	0.875	0.444444	0.5
	18	1.07143	1.66667	1.42857		3.75	2.75	2	2.28571	0.5625	0.875	0.375	0.785714	0.222222	1.375	0.388889	0.714286
	21	1.21429	1	2.14286		5	5.25	1.5	2.28571	0.4375	0.625	0.75	1.14286	1.33333	0.75	0.333333	0.5
	24	0.928571	2.22222	1.71429		5.5	5	2.75	1.42857	0.5	1.375	1.25	0.928571		0.875	1	0.571429
	27	1	2.11111	1.57143		6.75	4.25	2	0.571429	0.5625	1.625	0.5	0.785714		0.875	0.5	0.642857
	30	1.35714	1.22222	1.85714		4.75	2.75	3	1.14286	0.4375	0.875	0.875	0.642857		0.875		0.285714

## Sheet: Figure 2G
UNC-40::GFP Polarity in HSN
	wildtype	unc-6(ev400)
	-0.93012	0.215222
	-0.78449	0.162342
	-0.94982	-0.472674
	-0.43339	-0.776083
	-0.60558	-0.480619
	-0.79323	-0.913593
	-0.47853	0.268444
	-0.8639	-0.198145
	-0.67376	-0.203592
	-0.86197	-0.493019
	-0.53783	-0.167243
	-0.98435	0.0783145
	-0.99097	-0.194811
	-0.90234	-0.769702
	-0.89122	-0.866841
	-0.98319	-0.25103
	-0.52932	-0.309634
	-0.8914	-0.10486
	-0.36495	-0.20912
	-0.95145	-0.402815
		-0.353955

## Sheet: Figure 2H
Percent of axon branching
	gentoype	Ventral	Dorsal	SE
	wildtype	0.5556	0.4444	0.0524
	unc-6(ev400)	0.386	0.614	0.0456
	unc-40(e1430)	0.2807	0.7193	0.0421

## Sheet: Figure 2I
		branch length
	time(min)	wildtype	unc-6(ev400)	unc-40(e1430)
	0	0	0	0
	3	0.952	0.692	0.571
	6	1.607	1.222	0.966
	9	1.723	1.011	0.62
	12	2.285	0.939	0.715
	15	2.456	1.303	0.664
	18	2.247	1.211	0.546
	21	3.141	1.311	0.546
	24	2.852	1.679	0.597
	27	2.783	1.765	0.774
	30	3.4	1.679	0.85
	33	3.516	1.343	1.386
	36	3.586	0.927	1.158
	39	3.823	0.722	1.183
	42	3.451	0	0.657
	45	3.756		0
	48	4.168
	51	4.057
	54	4.129

## Sheet: Figure 2J
	average ventral branch speed
	wildtype	unc-6(ev400)	unc-40(e1430)
	0.1512	0	0
	0.262917	0	0
	0	0	0
	0	0	0
	0	0	0
	0.106238	0	0
	0	0	0.0823333
	0	0	0
	0	0.0923889	0.0445
	0	0.0358205	0
	0.177222	0	0
	0	0	0
	0.0686905	0	0
	0.0563889	0	0
	0	0	0
	0	0	0
	0.190267	0.0992381	0
	0	0	0
	0	0.145458	0
	0	0	0
	0.340444	0	0
	0	0	0
	0	0	0
	0.237733	0	0
	0	0	0
	0	0	0
	0	0	0
	0	0	0
	0.072	0	0
	0.200333	0	0
	0.271889	0	0
	0.0620556	0	0
	0.0646154	0
	0	0
	0	0
	0	0
	0	0
	0	0
	0	0
	0	0
	0	0
	0	0
	0	0
	0
	0
	0
	0
	0
	0
	0.0611944

## Sheet: Figure 2K
Percent of Axons that Stabilize at VNC within 4h
	gentoype	Percent	SE
	wildtype	0.666	0.094
	unc-6(ev400)	0.078	0.038
	unc-40(e1430)	0.039	0.027

## Sheet: Figure 2-figure supplement 1A
	Angle of axon emergence (degrees)
	wildtype	unc-6(ev400)	unc-40(e1430)
	-35.106	60.542	-47.249
	-33.771	-43.246	69.515
	3.561	6.693	-13.64
	-112.928	-55.408	34.553
	-108.725	-145.359	6.198
	-127.266	-55.485	15.318
	-75.181	-50.254	173.565
	-93.557	42.739	-63.137
	-69.344	106.57	-113.41
	-117.575	17.08	172.784
	-111.134	-33.355	-22.385
	-95.121	-82.326	-76.266
	-132.865	-115.989	-55.847
	-20.066	-157.67	-122.471
	-89.607	-110.208	176.456
	-101.212	-126.87	-11.868
	-86.217	-135.512	9.432
	-87.003	16.098	-132.329
	-89.341	154.654	101.15
	-72.345	-10.697	24.947
	-46.614	164.664	-71.707
	-49.086	-47.808	16.128
		-24.52	170.015
		-137.404	-177.577
		-108.435	5.252
		-4.399	179.884
		-21.234	161.451
		157.897	-102.971
		-53.861	3.589
		-178.481	-21.257
		-17.184	-154.617
		-73.857
		-83.66

## Sheet: Figure 2-figure supplement 1B
	Sin(angle of axon emergence)
	wildtype	unc-6(ev400)	unc-40(e1430)
	-0.575091	0.870716	-0.734311
	-0.555875	-0.685132	0.0625989
	0.0621112	0.116549	-0.362552
	-0.920995	-0.076702	-0.428667
	-0.94707	-0.362178	-0.042277
	-0.795833	-0.823216	0.936764
	-0.966739	-0.568433	-0.235821
	-0.998074	-0.823978	0.567168
	-0.935715	-0.768886	0.107965
	-0.886406	-0.948683	0.264176
	-0.93274	0.67866	0.112076
	-0.996008	-0.676825	-0.89209
	-0.732959	0.958472	-0.917685
	-0.343102	0.293707	0.42178
	-0.999976	-0.415011	-0.949464
	-0.980914	-0.549825	0.277784
	-0.997821	-0.991044	0.17339
	-0.998632	-0.898878	0.981124
	-0.999934	-0.379941	0.12561
	-0.9529	-0.938445	-0.380828
	-0.726743	-0.799999	0.0915364
	-0.755693	-0.70076	0.0020246
		0.277281	0.318116
		0.428084	-0.974484
		-0.185615	-0.971408
		0.264479	-0.827541
		-0.740898	-0.843663
			0.061815
			-0.205658
			-0.73929
			0.163877

## Sheet: Figure 2-figure supplement 1E
	UNC-40::GFP intensity in nerve ring
	wildtype	unc-6(ev400)
	173.941	125.101
	212.875	176.858
	195.741	139.693
	190.306	160.938
	170.526	171.188
	230.195	105.285
	209.45	193.207
	195.973	123.681
	190.712	124.965
	224.948	191.527
	170.105	167.664
	173.705	189.74
	195.77

[truncated: 5 more sheets: Figure 2-figure supplement 1F, Figure 2-figure supplement 1G, Figure 2-figure supplement 1I, Figure 2-figure supplement 1K, Figure 2-figure supplement 1M]
