# Supplementary material for: UNC-6/Netrin promotes both adhesion and directed growth within a single axon
Source: eLife. 2025 Mar 7;13:RP100424. doi: 10.7554/eLife.100424 (PMC11888602; doi:10.7554/eLife.100424)
Supplement: Figure 3—source data 1. [file elife-100424-fig3-data1.xlsx]

## Sheet: Figure 3B
	Angle of axon emergence (degrees)
		slt-1(eh15)	unc-6(ev400); slt-1(eh15)
		133.191	34.621
		146.654	-127.063
		167.704	161.273
		-58.423	162.179
		35.526	27.199
		-111.371	-43.029
		-91.283	-30.996
		-172.017	90.07
		-109.617	-162.813
		-69.57	-172.212
		-8.931	2.793
		34.404	-73.497
		-31.148	-25.133
		-103.936	-165.188
		39.83	78.627
		-137.495	-177.337
		179.019	170.185
		-32.601	-144.422
		56.171	-24.979
		-68.383	-159.548
		50.274	43.527
		-99.232	-164.601
		148.401	165.889
		-19.428	162.625
			136.136
			-37.256

## Sheet: Figure 3C
	Sin(angle of axon emergence)
	wildtype	unc-6(ev400)	slt-1(eh15)	unc-6(ev400); slt-1(eh15)
	-0.575091	0.870716	0.729076	0.568145
	-0.555875	-0.685132	0.549694	-0.797973
	0.0621112	0.116549	0.212962	0.321059
	-0.920995	-0.076702	-0.851937	0.306044
	-0.94707	-0.362178	0.581072	0.457082
	-0.795833	-0.823216	-0.93124	-0.682368
	-0.966739	-0.568433	-0.999749	-0.514978
	-0.998074	-0.823978	-0.332622	0.999999
	-0.935715	-0.768886	-0.138879	-0.295491
	-0.886406	-0.948683	-0.941958	-0.135508
	-0.93274	0.67866	-0.937099	0.0487277
	-0.996008	-0.676825	-0.155245	-0.958805
	-0.732959	0.958472	0.565025	-0.424721
	-0.343102	0.293707	0.523971	-0.255648
	-0.999976	-0.415011	-0.51725	0.980364
	-0.980914	-0.549825	-0.970565	-0.0464614
	-0.997821	-0.991044	0.76911	0.170467
	-0.998632	-0.898878	-0.987047	-0.581811
	-0.999934	-0.379941	0.640512	-0.422286
	-0.9529	-0.938445	-0.675655	-0.349423
	-0.726743	-0.799999	-0.929667	0.298624
	-0.755693	-0.70076	0.0171208	0.688696
		0.277281	-0.538786	-0.265539
		0.428084	0.830703	0.243801
		-0.185615		0.692949
		0.264479		-0.605377
		-0.740898

## Sheet: Figure 3D
Percent of Axons that Stabilize at vSLNC after Initial Contact
	gentoype	Percent	SE
	wildtype	0.8696	0.07
	unc-6(ev400)	0.5	0.119
	slt-1(eh15)	0.857	0.132
	unc-6(ev400); slt-1(eh15)	0.429	0.187

## Sheet: Figure 3E
	Percent of axon branching
		gentoype	Ventral	Dorsal	SE
		wildtype	0.5556	0.4444	0.0524
		unc-6(ev400)	0.386	0.614	0.0456
		slt-1(eh15)	0.5899	0.4101	0.0417
		unc-6(ev400); slt-1(eh15)	0.3043	0.6957	0.0554

## Sheet: Figure 3F
	Percent of Axons that Stabilize at VNC within 4h
		gentoype	Percent	SE
		wildtype	0.666	0.094
		unc-6(ev400)	0.078	0.038
		slt-1(eh15)	0.1	0.095
		unc-6(ev400); slt-1(eh15)	0.1	0.095
