# Supplementary material for: UNC-6/Netrin promotes both adhesion and directed growth within a single axon
Source: eLife. 2025 Mar 7;13:RP100424. doi: 10.7554/eLife.100424 (PMC11888602; doi:10.7554/eLife.100424)
Supplement: Figure 4—source data 1. [file elife-100424-fig4-data1.xlsx]

## Sheet: Figure 4B
Percent of Axons that Stabilize at vSLNC after Initial Contact
	gentoype	Percent	SE
	wildtype	0.8696	0.07
	unc-6(ev400)	0.5	0.119
	madd-2(ok2226)	0.5	0.151

## Sheet: Figure 4D
UNC-40::GFP Polarity in HSN
	wildtype	unc-6(ev400)	madd-2(ok2226)	madd-2(ok2226); unc-6(ev400)
	-0.93012	0.215222	-0.74527	-0.41174
	-0.78449	0.162342	-0.47076	-0.15854
	-0.94982	-0.472674	-0.65358	-0.21227
	-0.43339	-0.776083	-0.38974	-0.16983
	-0.60558	-0.480619	-0.81685	-0.13559
	-0.79323	-0.913593	-0.35205	-0.11339
	-0.47853	0.268444	-0.38553	-0.12927
	-0.8639	-0.198145	-0.56937	-0.10462
	-0.67376	-0.203592	0.818557	-0.07911
	-0.86197	-0.493019	0.065567	-0.03914
	-0.53783	-0.167243	-0.75661	-0.02363
	-0.98435	0.0783145	-0.43607	-0.00937
	-0.99097	-0.194811	-0.26919	0.007933
	-0.90234	-0.769702	-0.06937	0.051
	-0.89122	-0.866841	0.060056	0.054816
	-0.98319	-0.25103	-0.04472	0.058756
	-0.52932	-0.309634	-0.09705	0.060515
	-0.8914	-0.10486	-0.24991	0.165359
	-0.36495	-0.20912	-0.21358	0.378424
	-0.95145	-0.402815	-0.29848
		-0.353955	-0.61366
			-0.1397
			-0.18231

## Sheet: Figure 4F
UNC-40::GFP Polarity in HSN
	wildtype	madd-2(ok2226)	unc-40(4KR)	unc-40(4KR); madd-2(ok2226)
	-0.93012	-0.74527	-0.917891	-0.19076
	-0.78449	-0.47076	-0.604559	-0.27946
	-0.94982	-0.65358	-0.520119	-0.15882
	-0.43339	-0.38974	0.185916	0.030957
	-0.60558	-0.81685	-0.738574	-0.30922
	-0.79323	-0.35205	-0.338317	0.10493
	-0.47853	-0.38553	0.18877	-0.4289
	-0.8639	-0.56937	-0.303439	-0.36071
	-0.67376	0.818557	-0.295453	-0.50606
	-0.86197	0.065567	-0.120076	-0.14432
	-0.53783	-0.75661	-0.156823	0.064516
	-0.98435	-0.43607	-0.529444	-0.48631
	-0.99097	-0.26919	-0.0560234	-0.02672
	-0.90234	-0.06937	0.210827	-0.10749
	-0.89122	0.060056	-0.477548	-0.42923
	-0.98319	-0.04472	0.356366	0.248424
	-0.52932	-0.09705	0.265516	-0.70048
	-0.8914	-0.24991	-0.239771	-0.1921
	-0.36495	-0.21358	-0.841044	0.118456
	-0.95145	-0.29848	0.0731178	-0.4488
		-0.61366	-0.0235536
		-0.1397
		-0.18231

## Sheet: Figure 4G
Percent of axon branching
	gentoype	Ventral	Dorsal	SE
	wildtype	0.5556	0.4444	0.0524
	unc-6(ev400)	0.386	0.614	0.0456
	madd-2(ok2226)	0.5222	0.4778	0.069

## Sheet: Figure 4H
Percent of Axons that Stabilize at VNC within 4h
	gentoype	Percent	SE
	wildtype	0.666	0.094
	unc-6(ev400)	0.078	0.038
	madd-2(ok2226)	0.2	0.089

## Sheet: Figure 4-figure supplement 1A
	Angle of axon emergence (degrees)
	madd-2(ok2226)
	15.758
	154.389
	11.268
	-55.694
	-87.343
	-85.923
	-80.704
	-155.274
	-75.069
	-107.958
	-97.739

## Sheet: Figure 4-figure supplement 1B
	Sin(angle of axon emergence)
	wildtype	unc-6(ev400)	madd-2(ok2226)
	-0.575091	0.870716	0.271575
	-0.555875	-0.685132	0.432259
	0.0621112	0.116549	0.195398
	-0.920995	-0.076702	-0.990892
	-0.94707	-0.362178	-0.826039
	-0.795833	-0.823216	-0.418279
	-0.966739	-0.568433	-0.966237
	-0.998074	-0.823978	-0.998925
	-0.935715	-0.768886	-0.997469
	-0.886406	-0.948683	-0.951283
	-0.93274	0.67866	-0.986867
	-0.996008	-0.676825
	-0.732959	0.958472
	-0.343102	0.293707
	-0.999976	-0.415011
	-0.980914	-0.549825
	-0.997821	-0.991044
	-0.998632	-0.898878
	-0.999934	-0.379941
	-0.9529	-0.938445
	-0.726743	-0.799999
	-0.755693	-0.70076
		0.277281
		0.428084
		-0.185615
		0.264479
		-0.740898

## Sheet: Figure 4-figure supplement 1D
		UNC-40::GFP Intensity normalized to t=0
time (min) relative to vSLNC contact		wildtype								madd-2(ok2226)
	-15	0.357143	0.666667		0.444444	1	1.5	1.25	0.142857	0.666667	0.571429	0.833333	2	3	0.909091	0.777778	1.83333	3.33333	0.357143
	-12	0.142857	0.555556		0.444444	1	1.25	0.5	0.571429	1.66667	1.14286	0.666667	4	2.66667	0.545455	0.777778	1	5.33333	0.357143
	-9	0.214286	0.777778	1.14286	0.333333	0.75	1.25	0.875	1	0.777778	0.857143	0.666667	1	3	0.636364	0.444444	1.16667	5.66667	0.285714
	-6	0.428571	1.11111	1.14286	0.555556	1.75	1	0.75	1	1.22222	0.857143	1.83333	2.66667	2.33333	1.09091	0.666667	1.33333	2.66667	0.714286
	-3	0.571429	0.888889	0.714286	0.777778	1.75	1.5	1.125	0.714286	0.777778	1.71429	2.5	2.66667	2.33333	0.636364	0.888889	1.83333	1.33333	0.642857
	0	1	1	1	1	1	1	1	1	1	1	1	1	1	1	1	1	1	1
	3	1.21429	2.11111	1.71429	1.77778	2.25	4	2.5	1.28571	1.66667	0.857143	0.666667	2.33333	3.33333	0.818182	0.888889	1.5	1	1.14286
	6	0.5	2.55556	2.42857	1.44444	3.25	6.25	1.5	2.42857	1.22222	1.71429	0.833333	2	1.33333	0.454545	0.666667	1.16667	2.33333	0.714286
	9	1.42857	1.77778	1.42857	2.22222	3.5	5	2.25	2	1.66667	0.714286	1.16667	1.33333	1.66667	0.363636	0.555556	2	3.33333	0.571429
	12	0.785714	1.88889	2.85714	1.33333	3.75	4.25	3.25	2	0.666667	2.42857	2.5	2.33333	1.66667	0.545455	0.444444	0.833333	2.66667	0.571429
	15	0.857143	2.44444	2		4.5	4.25	1.625	2	1.33333	0.714286	2.66667	3.33333	2.33333	0.363636	0.888889	1.66667	2	1.07143
	18	1.07143	1.66667	1.42857		3.75	2.75	2	2.28571	0.555556	1	3	1.66667	3.66667	0.636364	0.444444	1.33333	1.66667
	21	1.21429	1	2.14286		5	5.25	1.5	2.28571	0.777778	1.57143	4	2.66667	2.33333	0.636364	0.777778	1.5	2.33333
	24	0.928571	2.22222	1.71429		5.5	5	2.75	1.42857	0.777778	1.42857	1	2.33333	3.33333	0.545455	0.555556	2.16667	3.66667
	27	1	2.11111	1.57143		6.75	4.25	2	0.571429	0.777778	1	2.66667	1.66667	4	0.909091	1.55556	0.666667	3.66667
	30	1.35714	1.22222	1.85714		4.75	2.75	3	1.14286	0.555556	1	1.5	3	3.33333	0.545455	0.555556	0.5	4.33333

## Sheet: Figure 4-figure supplement 1E
	UNC-40::GFP density in HSN dorsal cell body
	wildtype	unc-6(ev400)	madd-2(ok2226)	madd-2(ok2226); unc-6(ev400)
	65.7477	387.299	300.53	1200.04
	271.241	598.997	538.433	3456.6
	33.1994	307.578	621.157	1320.87
	511.702	142.34	1023.46	1296.47
	386.602	508.183	241.222	1672.99
	202.813	130.678	645.944	2030.75
	597.233	1025.72	1018.12	1322.98
	236.874	1034.11	485.598	1323.58
	165.623	330.423	948.284	1326.5
	195.106	388.937	524.788	1464.05
	379.401	546.949	104.169	2155.5
	9.63203	781.377	210.12	2962.9
	11.6774	517.653	512.537	1878.68
	90.7853	173.248	467.169	1251.78
	39.0767	34.62	897.329	1335.41
	28.4272	478.358	655.842	1390.22
	697.903	364.482	570.645	2093.15
	99.9682	1078.91	381.466	1223.53
	486.907	783.969	572.357	1644.86
	73.8132	1148.98	272.837
		474.59	460.223
			465.408
			376.505

## Sheet: Figure 4-figure supplement 1F
	UNC-40::GFP density in HSN vSLNC contact site
	wildtype	unc-6(ev400)	madd-2(ok2226)	madd-2(ok2226); unc-6(ev400)
	1815.93	250.114	2059.02	2879.92
	2246	431.675	1496.31	4759.13
	1289.95	858.979	2965.04	2032.75
	1294.49	1129.02	2330.68	1826.93
	1573.73	1448.69	2392.96	2197.84
	1758.94	2894.01	1347.86	2550.17
	1693.36	591.567	2295.66	1715.8
	3244.02	1545.18	1769.67	1632.89
	849.728	499.36	94.6131	1554.4
	2632	1145.39	460.205	1583.31
	1262.41	766.637	751.815	2259.84
	1220.98	667.879	535.078	3018.94
	2574.24	768.14	890.118	1849.11
	1768.49	1331.31	536.814	1130.29
	679.368	485.36	795.656	1196.61
	3353.01	799.019	717.239	1235.92
	2267.59	691.428	693.312	1854.27
	1741.13	1331.69	635.648	876.306
	1046.54	1198.55	883.236	741.719
	2966.88	2699	505.003
		994.627	1922.27
			616.559
			544.389

[truncated: 5 more sheets: Figure 4-figure supplement 1G, Figure 4-figure supplement 1H, Figure 4-figure supplement 1J, Figure 4-figure supplement 1L, Figure 4-figure supplement 1N]
