# Supplementary material for: UNC-6/Netrin promotes both adhesion and directed growth within a single axon
Source: eLife. 2025 Mar 7;13:RP100424. doi: 10.7554/eLife.100424 (PMC11888602; doi:10.7554/eLife.100424)
Supplement: Figure 5—source data 1. [file elife-100424-fig5-data1.xlsx]

## Sheet: Figure 5C
Percent of Axons that Stabilize at vSLNC after Initial Contact
	gentoype	Percent	SE
	wildtype	0.8696	0.07
	unc-6(ev400)	0.5	0.119
	unc-6(ev400); Pmec-7::unc-6TM	0.9	0.095
	unc-6(ev400); Punc-4::unc-6TM	0.5	0.177
	unc-6(ev400); Pmec-7::unc-6::TM; Punc-4::unc-6TM	0.857	0.132

## Sheet: Figure 5E
	UNC-40::GFP Polarity in HSN
		wildtype	unc-6(ev400)	unc-6(ev400); Pmec-7::unc-6TM	unc-6(ev400); Punc-4::unc-6TM
		-0.93012	0.215222	-0.550337	-0.354571
		-0.78449	0.162342	-0.663517	-0.365258
		-0.94982	-0.472674	-0.539292	-0.231992
		-0.43339	-0.776083	-0.768614	-0.442053
		-0.60558	-0.480619	-0.556061	-0.319503
		-0.79323	-0.913593	-0.712715	-0.447015
		-0.47853	0.268444	-0.846578	-0.141122
		-0.8639	-0.198145	-0.880464	0.0160336
		-0.67376	-0.203592	-0.914681	-0.629874
		-0.86197	-0.493019	-0.668528	-0.0751629
		-0.53783	-0.167243	-0.995232	-0.0546595
		-0.98435	0.0783145	-0.785801	-0.117161
		-0.99097	-0.194811	-0.369036	-0.0215669
		-0.90234	-0.769702	-0.351451	-0.275022
		-0.89122	-0.866841	-0.392474	0.174134
		-0.98319	-0.25103	-0.575904	-0.552386
		-0.52932	-0.309634	-0.620392	-0.121616
		-0.8914	-0.10486	-0.815895	-0.140392
		-0.36495	-0.20912	-0.628237
		-0.95145	-0.402815	-0.628166
			-0.353955	-0.738621
				-0.569199
				-0.589123
				-0.514969
				-0.805483

## Sheet: Figure 5F
	Percent of axon branching
		gentoype	Ventral	Dorsal	SE
		wildtype	0.5556	0.4444	0.0524
		unc-6(ev400)	0.386	0.614	0.0456
		unc-6(ev400); Pmec-7::unc-6TM	0.4	0.6	0.0478
		unc-6(ev400); Punc-4::unc-6TM	0.3494	0.6506	0.0523
		unc-6(ev400); Pmec-7::unc-6::TM; Punc-4::unc-6TM	0.3981	0.6019	0.0471

## Sheet: Figure 5G
Percent of Axons that Stabilize at VNC within 4h
	gentoype	Percent	SE
	wildtype	0.666	0.094
	unc-6(ev400)	0.078	0.038
	unc-6(ev400); Pmec-7::unc-6TM	0.04	0.039
	unc-6(ev400); Punc-4::unc-6TM	0.071	0.069
	unc-6(ev400); Pmec-7::unc-6::TM; Punc-4::unc-6TM	0.263	0.101

## Sheet: Figure 5-figure supplement 1B
	Angle of axon emergence (degrees)
	unc-6(ev400); Pmec-7::unc-6TM	unc-6(ev400); Punc-4::unc-6TM
	-88.397	147.543
	4.528	-142.607
	-54.064	-49.634
	-168.863	12.127
	164.827	-123.783
	-58.281	157.455
	-80.789	4.874
	-159.31	173.941
	158.097	171.686
	-29.055	-108.39
	-137.028	-60.642
	-168.647	-136.027
	-77.287	-124.461
	-160.619
	127.816
	157.345
	171.528
	-120.75
	-10.238
	-173.387
	-140.977
	-64.632
	-94.926
	-136.901
	-144.802
	-43.678
	-106.63
	5.036

## Sheet: Figure 5-figure supplement 1C
	Sin(angle of axon emergence)
	wildtype	unc-6(ev400)	unc-6(ev400); Pmec-7::unc-6TM	unc-6(ev400); Punc-4::unc-6TM
	-0.575091	0.870716	-0.999609	0.536667
	-0.555875	-0.685132	0.0789463	-0.607279
	0.0621112	0.116549	-0.958173	-0.761923
	-0.920995	-0.076702	0.0877817	0.210079
	-0.94707	-0.362178	-0.809673	-0.694319
	-0.795833	-0.823216	-0.193156	-0.824511
	-0.966739	-0.568433	0.261734	-0.831149
	-0.998074	-0.823978	-0.850637	0.383409
	-0.935715	-0.768886	-0.987106	-0.871573
	-0.886406	-0.948683	-0.690605	0.0849648
	-0.93274	0.67866	-0.353312	0.105552
	-0.996008	-0.676825	0.373036	0.144598
	-0.732959	0.958472	-0.485649	-0.948931
	-0.343102	0.293707	-0.681641
	-0.999976	-0.415011	-0.196853
	-0.980914	-0.549825	-0.975485
	-0.997821	-0.991044	-0.331848
	-0.998632	-0.898878	0.789984
	-0.999934	-0.379941	0.385181
	-0.9529	-0.938445	-0.859406
	-0.726743	-0.799999	0.147326
	-0.755693	-0.70076	-0.177737
		0.277281	-0.115163
		0.428084	-0.629632
		-0.185615	-0.903575
		0.264479	-0.996306
		-0.740898	-0.683261
			-0.576404

## Sheet: Figure 5-figure supplement 1E
	UNC-40::GFP density in HSN dorsal cell body
	wildtype	unc-6(ev400)	unc-6(ev400); Pmec-7::unc-6TM	unc-6(ev400); Punc-4::unc-6TM
	65.7477	387.299	619.225	353.424
	271.241	598.997	575.993	799.525
	33.1994	307.578	697.265	807.403
	511.702	142.34	354.633	1050.22
	386.602	508.183	538.93	494.638
	202.813	130.678	295.949	831.951
	597.233	1025.72	228.678	1073.83
	236.874	1034.11	64.8016	840.922
	165.623	330.423	123.533	215.881
	195.106	388.937	396.262	1082.74
	379.401	546.949	5.39835	1038.65
	9.63203	781.377	330.75	663.981
	11.6774	517.653	636.251	1064.03
	90.7853	173.248	494.408	357.363
	39.0767	34.62	661.434	671.224
	28.4272	478.358	660.457	289.401
	697.903	364.482	342.196	508.966
	99.9682	1078.91	248.842	963.526
	486.907	783.969	429.217
	73.8132	1148.98	268.543
		474.59	233.375
			524.244
			579.475
			950.619
			513.365

## Sheet: Figure 5-figure supplement 1F
	UNC-40::GFP density in HSN vSLNC contact site
	wildtype	unc-6(ev400)	unc-6(ev400); Pmec-7::unc-6TM	unc-6(ev400); Punc-4::unc-6TM
	1815.93	250.114	2134.95	741.736
	2246	431.675	2847.61	1719.69
	1289.95	858.979	2329.66	1295.19
	1294.49	1129.02	2710.65	2714.36
	1573.73	1448.69	1889.02	959.118
	1758.94	2894.01	1764.37	2177
	1693.36	591.567	2752.35	1426.71
	3244.02	1545.18	1019.42	814.382
	849.728	499.36	2772.26	950.646
	2632	1145.39	1994.67	1258.73
	1262.41	766.637	2258.9	1158.76
	1220.98	667.879	2757.5	840.214
	2574.24	768.14	1380.51	1110.94
	1768.49	1331.31	1030.25	628.495
	679.368	485.36	1516.03	472.128
	3353.01	799.019	2454.2	1003.68
	2267.59	691.428	1460.7	649.904
	1741.13	1331.69	2454.41	1278.26
	1046.54	1198.55	1879.87
	2966.88	2699	1175.88
		994.627	1552.34
			1909.57
			2241.2
			2969.21
			4764.99
