# Supplementary material for: UNC-6/Netrin promotes both adhesion and directed growth within a single axon
Source: eLife. 2025 Mar 7;13:RP100424. doi: 10.7554/eLife.100424 (PMC11888602; doi:10.7554/eLife.100424)
Supplement: Figure 7—source data 1. [file elife-100424-fig7-data1.xlsx]

## Sheet: Figure 7B
		Intensity of UNC-6 foci contactin HSN
		Mean	SEM	N
	wildtype	817.15	4.68915	861
	unc-40(e1430)	597.649	4.34179	1306
