# Supplementary material for: UNC-6/Netrin promotes both adhesion and directed growth within a single axon
Source: eLife. 2025 Mar 7;13:RP100424. doi: 10.7554/eLife.100424 (PMC11888602; doi:10.7554/eLife.100424)
Supplement: Supplementary file 1. [file elife-100424-supp1.xlsx]

## Sheet: Sheet1
Figure 1	Strain	Labeled as	Genotype	Descriptions	Reference
1B,E	TV25490	PDE, AVM, PVM, PQR	unc-40(wy1354); wyIs900	wy1354=unc-40::gfp::aid; wyIs900=[Plin-32::mCherry::PH+Punc-122::mCherry]	this paper
1B	TV23560	Adult morphology	otIs181; maIs188	otIs181=Pdat-1::mCherry; maIs188=Pmir-288::GFP	Lee et al.
1D	N2		N2		Brenner
1E	TV27240	HSN	unc-40(wy1354); wyIs918	wy1354=unc-40::gfp::aid; wyIs918=[Punc-86::mCherry::PLCdeltaPH+Podr-1::GFP]	this paper
1F	TV29142		wyIs900; wyEx6177	wyIs900=[Plin-32::mCherry::PH+Punc-122:mCherry]; wyEx6177=[Pmec-7::GFP + Podr-1::GFP]	this paper
Figure 2	Strain	Labeled as	Genotype	Descriptions	Reference
2A-D,H-K	TV25490	wildtype	unc-40(wy1354); wyIs900	wy1354=unc-40::gfp::aid; wyIs900=[Plin-32::mCherry::PH+Punc-122::mCherry]	this paper
2A-D,H-K	TV27520	unc-6(ev400)	unc-6(ev400); unc-40(wy1354); wyIs900	ev400=putative null allele; wy1354=unc-40::gfp::aid; wyIs900=[Plin-32::mCherry::PH+Punc-122::mCherry]	this paper
2A,B,H-K	TV27138	unc-40(e1430)	unc-40(e1430); wyIs900	e1430=putative null allele; wyIs900=[Plin-32::mCherry::PH+Punc-122::mCherry]	this paper
2E,G	TV27240	wildtype	unc-40(wy1354); wyIs918	wy1354=unc-40::gfp::aid; wyIs918=[Punc-86::mCherry::PLCdeltaPH+Podr-1::GFP]	this paper
2E,G	TV29057	unc-6(ev400)	unc-6(ev400); unc-40(wy1354); wyIs918	ev400=putative null allele; wy1354=unc-40::gfp::aid; wyIs918=[Punc-86::mCherry::PLCdeltaPH+Podr-1::GFP]	this paper
Figure 3	Strain	Labeled as	Genotype	Descriptions	Reference
3	TV25490	wildtype	unc-40(wy1354); wyIs900	wy1354=unc-40::gfp::aid; wyIs900=[Plin-32::mCherry::PH+Punc-122::mCherry]	this paper
3	TV27709	slt-1(eh15)	slt-1(eh15); unc-40(wy1354); wyIs900	eh15=putative null allele; wy1354=unc-40::gfp::aid; wyIs900=[Plin-32::mCherry::PH+Punc-122::mCherry]	this paper
3	TV26771	unc-6(ev400); slt-1(eh15)	unc-6(ev400); slt-1(eh15); wyEx9914	ev400=putative null allele; eh15=putative null allele; wyEx9914=[Plin-32::mCherry::PH+Punc-122::mCherry]	this paper
3B-F	TV27520	unc-6(ev400)	unc-6(ev400); unc-40(wy1354); wyIs900	ev400=putative null allele; wy1354=unc-40::gfp::aid; wyIs900=[Plin-32::mCherry::PH+Punc-122::mCherry]	this paper
Figure 4	Strain	Labeled as	Genotype	Descriptions	Reference
4A,B,G,H	TV25490	wildtype	unc-40(wy1354); wyIs900	wy1354=unc-40::gfp::aid; wyIs900=[Plin-32::mCherry::PH+Punc-122::mCherry]	this paper
4A,B,G,H	TV27775	madd-2(ok2226)	madd-2(ok2226); unc-40(wy1354); wyIs900	ok2226=putative null allele, wy1354=unc-40::gfp::aid; wyIs900=[Plin-32::mCherry::PH+Punc-122::mCherry]	this paper
4B,G,H	TV27520	unc-6(ev400)	unc-6(ev400); unc-40(wy1354); wyIs900	ev400=putative null allele; wy1354=unc-40::gfp::aid; wyIs900=[Plin-32::mCherry::PH+Punc-122::mCherry]	this paper
4C,D,F	TV27240	wildtype	unc-40(wy1354); wyIs918	wy1354=unc-40::gfp::aid; wyIs918=[Punc-86::mCherry::PLCdeltaPH+Podr-1::GFP]	this paper
4C,D,F	TV28511	madd-2(ok2226)	madd-2(ok2226); unc-40(wy1354); wyIs918	ok2226=putative null allele, wy1354=unc-40::gfp::aid; wyIs918=[Plin-32::mCherry::PH+Punc-122::mCherry]	this paper
4C,D	TV28366	unc-6(ev400); madd-2(ok2226)	unc-6(ev400); madd-2(ok2226); unc-40(wy1354); wyIs918	ev400=putative null allele; ok2226=putative null allele; wy1354=unc-40::gfp::aid; wyIs918=[Punc-86::mCherry::PLCdeltaPH+Podr-1::GFP]	this paper
4C,F	TV29217	unc-40(4KR)	unc-40(wy1948wy1354); wyis918	wy1948=K1108R K1116R K1123R K1124R substitutions; wy1354=unc-40::gfp::aid; wyIs918=[Punc-86::mCherry::PLCdeltaPH+Podr-1::GFP]	this paper
4C,F	TV30396	unc-40(4KR); madd-(ok2226)	unc-40(wy1948wy1354); madd-2(ok2226); wyIs918; otIs181	wy1948=K1108R K1116R K1123R K1124R substitutions; wy1354=unc-40::gfp::aid; ok2226=putative null allele; wyIs918=[Punc-86::mCherry::PLCdeltaPH+Podr-1::GFP]; otIs181=[Pdat-1::mCherry]	this paper
4D	TV29057	unc-6(ev400)	unc-6(ev400); unc-40(wy1354); wyIs918	ev400=putative null allele; wy1354=unc-40::gfp::aid; wyIs918=[Punc-86::mCherry::PLCdeltaPH+Podr-1::GFP]	this paper
Figure 5	Strain	Labeled as	Genotype	Descriptions	Reference
5B,C,F,G	TV25490	wildtype	unc-40(wy1354); wyIs900	wy1354=unc-40::gfp::aid; wyIs900=[Plin-32::mCherry::PH+Punc-122::mCherry]	this paper
5B,C,F,G	TV27918	unc-6(ev400); Pmec-7::unc-6TM	unc-6(ev400); unc-40(wy1354) wyEx10439; wyIs900	ev400=putative null allele; wy1354=unc-40::gfp::aid; wyEx10439=[Pmec-7::unc-6::tm::snap + Podr-1::gfp];wyIs900=[Plin-32::mCherry::PH+Punc-122::mCherry]	this paper
5B,C,F,G	TV29211	unc-6(ev400); Punc-4::unc-6TM	unc-6(ev400); unc-40(wy1354) wyEx10645; wyIs900	ev400=putative null allele; wy1354=unc-40::gfp::aid; wyEx10645=[Punc-4::unc-6::tm::snap + Pmyo-2::mCherry]; wyIs900=[Plin-32::mCherry::PH+Punc-122::mCherry]	this paper
5B,C,F,G	TV29450	unc-6(ev400); Pmec-7::unc-6TM; Punc-4::unc-6TM	unc-6(ev400); unc-40(wy1354) wyEx10669; wyIs900	ev400=putative null allele; wy1354=unc-40::gfp::aid; wyEx10669=[Pmec-7::unc-6::tm::snap + Punc-4::unc-6::tm::snap + Pmyo-2::mCherry]; wyIs900=[Plin-32::mCherry::PH+Punc-122::mCherry]	this paper
5C,F,G	TV27520	unc-6(ev400)	unc-6(ev400); unc-40(wy1354); wyIs900	ev400=putative null allele; wy1354=unc-40::gfp::aid; wyIs900=[Plin-32::mCherry::PH+Punc-122::mCherry]	this paper
5D,E	TV27240	wildtype	unc-40(wy1354); wyIs918	wy1354=unc-40::gfp::aid; wyIs918=[Punc-86::mCherry::PLCdeltaPH+Podr-1::GFP]	this paper
5D,E	TV28682	unc-6(ev400); Pmec-7::unc-6TM	unc-6(ev400); unc-40(wy1354) wyEx10368; wyIs918	ev400=putative null allele; wy1354=unc-40::gfp::aid; wyEx10368=[Pmec-7::unc-6::tm::snap + Pmyo-2::mCherry]; wyIs918=[Punc-86::mCherry::PLCdeltaPH+Podr-1::GFP]	this paper
5D,E	TV28725	unc-6(ev400); Punc-4::unc-6TM	unc-6(ev400); unc-40(wy1354) wyEx10645; wyIs918	ev400=putative null allele; wy1354=unc-40::gfp::aid; wyEx10645=[Punc-4::unc-6::tm::snap + Pmyo-2::mCherry]; wyIs918=[Punc-86::mCherry::PLCdeltaPH+Podr-1::GFP]	this paper
5E	TV29057	unc-6(ev400)	unc-6(ev400); unc-40(wy1354); wyIs918	ev400=putative null allele; wy1354=unc-40::gfp::aid; wyIs918=[Punc-86::mCherry::PLCdeltaPH+Podr-1::GFP]	this paper
Figure 6	Strain	Labeled as	Genotype	Descriptions	Reference
6B,C	TV29558	HSN	unc-6(cp190); glo-1(wy2024); wyIs918	cp190=unc-6::mNG::3xFLAG, wy2024=null allele; wyIs918=[Punc-86::mCherry::PLCdeltaPH+Podr-1::GFP]	Naegeli et al., this paper
6A-C	TV29557	PDE, AVM	unc-6(cp190); glo-1(wy2023); wyIs900	cp190=unc-6::mNG::3xFLAG, wy2023=null allele; wyIs900=[Plin-32::mCherry::PH+Punc-122::mCherry]	Naegeli et al., this paper
6D-E		HSN	unc-40(e1430); unc-6(cp190); glo-1(wy2024); wyIs918	e1430=putative null allele, cp190=unc-6::mNG::3xFLAG, wy2024=null allele; wyIs918=[Punc-86::mCherry::PLCdeltaPH+Podr-1::GFP]	Naegeli et al., this paper
6D-E	TV30107	PDE, AVM	unc-40(e1430); unc-6(cp190); glo-1(wy2023); wyIs900	e1430=putative null allele, cp190=unc-6::mNG::3xFLAG, wy2023=null allele; wyIs900=[Plin-32::mCherry::PH+Punc-122::mCherry]	Naegeli et al., this paper
Figure 6	Strain	Labeled as	Genotype	Descriptions	Reference
7A,B	TV29558	HSN	unc-6(cp190); glo-1(wy2024); wyIs918	cp190=unc-6::mNG::3xFLAG, wy2024=null allele; wyIs918=[Punc-86::mCherry::PLCdeltaPH+Podr-1::GFP]	Naegeli et al., this paper
7A,B		HSN	unc-40(e1430); unc-6(cp190); glo-1(wy2024); wyIs918	e1430=putative null allele, cp190=unc-6::mNG::3xFLAG, wy2024=null allele; wyIs918=[Punc-86::mCherry::PLCdeltaPH+Podr-1::GFP]	Naegeli et al., this paper
Table 1	Strain	Labeled as	Genotype	Descriptions	Reference
1	TV23560	wildtype	otIs181; maIs188	otIs181=Pdat-1::mCherry; maIs188=Pmir-288::GFP	Lee et al.
1	TV25653	unc-6(ev400)	unc-6(ev400); otIs181; maIs188	ev400=putative null allele, otIs181=Pdat-1::mCherry; maIs188=Pmir-228::GFP	this paper
1	TV27085	unc-40(e1430)	unc-40(e1430); otIs181	e1430=putative null allele; otIs181=Pdat-1::mCherry	this paper
1	TV29527	unc-6(ev400); Pmec-7::unc-6TM	unc-6(ev400); wyEx10638; otIs181	ev400=putative null allele; wyEx10439=[Pmec-7::unc-6::tm::snap + Podr-1::gfp]; otIs181=Pdat-1::mCherry	this paper
1	TV29820	unc-6(ev400); Punc-4::unc-6TM	unc-6(ev400); wyEx10645; otIs181	ev400=putative null allele; wyEx10645=[Punc-4::unc-6::tm::snap + Pmyo-2::mCherry]; otIs181=Pdat-1::mCherry	this paper
1	TV29506	unc-6(ev400); Pmec-7::unc-6TM; Punc-4::unc-6TM	unc-6(ev400); wyEx10669; otIs181	ev400=putative null allele; wyEx10669=[Pmec-7::unc-6::tm::snap + Punc-4::unc-6::tm::snap + Pmyo-2::mCherry]; otIs181=Pdat-1::mCherry	this paper
1	TV30291	Pmec-7::unc-6TM	wyEx10638; otIs181	wyEx10439=[Pmec-7::unc-6::tm::snap + Podr-1::gfp]; otIs181=Pdat-1::mCherry	this paper
1	TV30354	Punc-4::unc-6TM	wyEx10645; otIs181	wyEx10645=[Punc-4::unc-6::tm::snap + Pmyo-2::mCherry]; otIs181=Pdat-1::mCherry	this paper
1	TV27335	slt-1(eh15)	slt-1(eh15); otIs181; maIs188	eh15=putative null allele; otIs181=Pdat-1::mCherry; maIs188=Pmir-228:GFP	this paper
1	TV30362	unc-6(ev400); slt-1(eh15)	unc-6(ev400); slt-1(eh15); otIs181	ev400=putative null allele; eh15=putative null allele; otIs181=Pdat-1::mCherry	this paper
1	TV27447	madd-2(ok2226)	madd-2(ok2226); otIs181; maIs188	ok2226=putative null allele; otIs181=Pdat-1::mCherry; maIs181=Pmir-288::GFP	this paper
1	TV28437	unc-6(ev400); madd-2(ok2226)	unc-6(ev400); madd-2(ok2226); otIs181	ev400=putative null allele; ok2226=putative null allele; otIs181=Pdat-1::mCherry	this paper
1	TV29488	unc-40(4KR)	unc-40(wy1948wy1354); otIs181	wy1948=K1108R K1116R K1123R K1124R substitutions; wy1354=unc-40::gfp::aid; otIs181=Pdat-1::mCherry	this paper
1	TV30396	unc-40(4KR); madd-(ok2226)	unc-40(wy1948wy1354); madd-2(ok2226); wyIs918; otIs181	wy1948=K1108R K1116R K1123R K1124R substitutions; wy1354=unc-40::gfp::aid; ok2226=putative null allele; wyIs918=[Punc-86::mCherry::PLCdeltaPH+Podr-1::GFP]; otIs181=[Pdat-1::mCherry]	this paper
Table 2	Strain	Labeled as	Genotype	Descriptions	Reference
2	TV27240	wildtype	unc-40(wy1354); wyIs918	wy1354=unc-40::gfp::aid; wyIs918=[Punc-86::mCherry::PLCdeltaPH+Podr-1::GFP]	this paper
2	TV29057	unc-6(ev400)	unc-6(ev400); unc-40(wy1354); wyIs918	ev400=putative null allele; wy1354=unc-40::gfp::aid; wyIs918=[Punc-86::mCherry::PLCdeltaPH+Podr-1::GFP]	this paper
2	TV29418	unc-40(e1430)	unc-40(e1430); wyIs918	e1439=putative null allele; wyIs918=[Punc-86::mCherry::PLCdeltaPH+Podr-1::GFP]	this paper
2	TV28682	unc-6(ev400); Pmec-7::unc-6TM	unc-6(ev400); unc-40(wy1354); wyEx10368; wyIs918	ev400=putative null allele; wy1354=unc-40::gfp::aid; wyEx10368=[Pmec-7::unc-6::tm::snap + Pmyo-2::mCherry]; wyIs918=[Punc-86::mCherry::PLCdeltaPH+Podr-1::GFP]	this paper
2	TV28725	unc-6(ev400); Punc-4::unc-6TM	unc-6(ev400); unc-40(wy1354); wyEx10645; wyIs918	ev400=putative null allele; wy1354=unc-40::gfp::aid; wyEx10645=[Punc-4::unc-6::tm::snap + Pmyo-2::mCherry]; wyIs918=[Punc-86::mCherry::PLCdeltaPH+Podr-1::GFP]	this paper
2	TV29009	unc-6(ev400); Pmec-7::unc-6TM; Punc-4::unc-6TM	unc-6(ev400); unc-40(wy1354); wyEx10669; wyIs918	ev400=putative null allele; wy1354=unc-40::gfp::aid; wyEx10669=[Pmec-7::unc-6::tm::snap + Punc-4::unc-6::tm::snap + Pmyo-2::mCherry]; wyIs918=[Punc-86::mCherry::PLCdeltaPH+Podr-1::GFP]	this paper
2	TV30373	Pmec-7::unc-6TM	wyEx10368; wyIs918	wyEx10368=[Pmec-7::unc-6::tm::snap + Pmyo-2::mCherry]; wyIs918=[Punc-86::mCherry::PLCdeltaPH+Podr-1::GFP]	this paper
2	TV30367	Punc-4::unc-6TM	wyEx10645; wyIs918	wyEx10645=[Punc-4::unc-6::tm::snap + Pmyo-2::mCherry]; wyIs918=[Punc-86::mCherry::PLCdeltaPH+Podr-1::GFP]	this paper
2	TV402	slt-1(eh15)	slt-1(eh15); kyIs262; kyIs321	eh15=putative null allele; kyIs262=[Punc-86::myr-GFP; Podr-1::RFP]; kyIs321=[Pnpr-11::DsRed + Punc-122::GFP]	this paper
2	TV22061	unc-6(ev400); slt-1(eh15)	unc-6(ev400); slt-1(eh15); kyIs262	ev400=putative null allele; eh15=putative null allele; kyIs262=[Punc-86::myr-GFP; Podr-1::RFP]	this paper
2	TV28511	madd-2(ok2226)	madd-2(ok2226); unc-40(wy1354); wyIs918	ok2226=putative null allele, wy1354=unc-40::gfp::aid; wyIs918=[Plin-32::mCherry::PH+Punc-122::mCherry]	this paper
2	TV28366	unc-6(ev400); madd-2(ok2226)	unc-6(ev400); madd-2(ok2226); unc-40(wy1354); wyIs918	ev400=putative null allele; ok2226=putative null allele; wy1354=unc-40::gfp::aid; wyIs918=[Punc-86::mCherry::PLCdeltaPH+Podr-1::GFP]	this paper
2	TV29217	unc-40(4KR)	unc-40(wy1948wy1354); wyis918	wy1948=K1108R K1116R K1123R K1124R substitutions; wy1354=unc-40::gfp::aid; wyIs918=[Punc-86::mCherry::PLCdeltaPH+Podr-1::GFP]	this paper
2	TV30396	unc-40(4KR); madd-(ok2226)	unc-40(wy1948wy1354); madd-2(ok2226); wyIs918; otIs181	wy1948=K1108R K1116R K1123R K1124R substitutions; wy1354=unc-40::gfp::aid; ok2226=putative null allele; wyIs918=[Punc-86::mCherry::PLCdeltaPH+Podr-1::GFP]; otIs181=[Pdat-1::mCherry]	this paper
Figure S1	Strain	Labeled as	Genotype	Descriptions	Reference
S1A-E,H-M	TV25490	wildtype	unc-40(wy1354); wyIs900	wy1354=unc-40::gfp::aid; wyIs900=[Plin-32::mCherry::PH+Punc-122::mCherry]	this paper
S1A-B,D-E,H-M	TV27520	unc-6(ev400)	unc-6(ev400); unc-40(wy1354); wyIs900	ev400=putative null allele; wy1354=unc-40::gfp::aid; wyIs900=[Plin-32::mCherry::PH+Punc-122::mCherry]	this paper
S1A-B	TV27138	unc-40(e1430)	unc-40(e1430); wyIs900	e1430=putative null allele; wyIs900=[Plin-32::mCherry::PH+Punc-122::mCherry]	this paper
S1F-G	TV27240	wildtype	unc-40(wy1354); wyIs918	wy1354=unc-40::gfp::aid; wyIs918=[Punc-86::mCherry::PLCdeltaPH+Podr-1::GFP]	this paper
S1F-G	TV29057	unc-6(ev400)	unc-6(ev400); unc-40(wy1354); wyIs918	ev400=putative null allele; wy1354=unc-40::gfp::aid; wyIs918=[Punc-86::mCherry::PLCdeltaPH+Podr-1::GFP]	this paper
S1N	TV25653	unc-6(ev400)	unc-6(ev400); otIs181; maIs188	ev400=putative null allele, otIs181=Pdat-1::mCherry; maIs188=Pmir-288::GFP	this paper
Figure S2	Strain	Labeled as	Genotype	Descriptions	Reference
S2A-D,I-N	TV27775	madd-2(ok2226)	madd-2(ok2226); unc-40(wy1354); wyIs900	ok2226=putative null allele, wy1354=unc-40::gfp::aid; wyIs900=[Plin-32::mCherry::PH+Punc-122::mCherry]	this paper
S2B-D, I-N	TV25490	wildtype	unc-40(wy1354); wyIs900	wy1354=unc-40::gfp::aid; wyIs900=[Plin-32::mCherry::PH+Punc-122::mCherry]	this paper
S2B	TV27520	unc-6(ev400)	unc-6(ev400); unc-40(wy1354); wyIs900	ev400=putative null allele; wy1354=unc-40::gfp::aid; wyIs900=[Plin-32::mCherry::PH+Punc-122::mCherry]	this paper
S2E-H	TV27240	wildtype	unc-40(wy1354); wyIs918	wy1354=unc-40::gfp::aid; wyIs918=[Punc-86::mCherry::PLCdeltaPH+Podr-1::GFP]	this paper
S2E-H	TV28511	madd-2(ok2226)	madd-2(ok2226); unc-40(wy1354); wyIs918	ok2226=putative null allele, wy1354=unc-40::gfp::aid; wyIs918=[Plin-32::mCherry::PH+Punc-122::mCherry]	this paper
S2E-F	TV28366	unc-6(ev400); madd-2(ok2226)	unc-6(ev400); madd-2(ok2226); unc-40(wy1354); wyIs918	ev400=putative null allele; ok2226=putative null allele; wy1354=unc-40::gfp::aid; wyIs918=[Punc-86::mCherry::PLCdeltaPH+Podr-1::GFP]	this paper
S2E-F	TV29057	unc-6(ev400)	unc-6(ev400); unc-40(wy1354); wyIs918	ev400=putative null allele; wy1354=unc-40::gfp::aid; wyIs918=[Punc-86::mCherry::PLCdeltaPH+Podr-1::GFP]	this paper
S2G-H	TV29217	unc-40(4KR)	unc-40(wy1948wy1354); wyis918	wy1948=K1108R K1116R K1123R K1124R substitutions; wy1354=unc-40::gfp::aid; wyIs918=[Punc-86::mCherry::PLCdeltaPH+Podr-1::GFP]	this paper
S2G-H	TV30396	unc-40(4KR); madd-(ok2226)	unc-40(wy1948wy1354); madd-2(ok2226); wyIs918; otIs181	wy1948=K1108R K1116R K1123R K1124R substitutions; wy1354=unc-40::gfp::aid; ok2226=putative null allele; wyIs918=[Punc-86::mCherry::PLCdeltaPH+Podr-1::GFP]; otIs181=[Pdat-1::mCherry]	this paper
Figure S3	Strain	Labeled as	Genotype	Descriptions	Reference
S3A	TV29450	unc-6(ev400); Pmec-7::unc-6TM; Punc-4::unc-6TM	unc-6(ev400); unc-40(wy1354) wyEx10669; wyIs900	ev400=putative null allele; wy1354=unc-40::gfp::aid; wyEx10669=[Pmec-7::unc-6::tm::snap + Punc-4::unc-6::tm::snap + Pmyo-2::mCherry]; wyIs900=[Plin-32::mCherry::PH+Punc-122::mCherry]	this paper
S3B-C	TV27918	unc-6(ev400); Pmec-7::unc-6TM	unc-6(ev400); unc-40(wy1354) wyEx10439; wyIs900	ev400=putative null allele; wy1354=unc-40::gfp::aid; wyEx10439=[Pmec-7::unc-6::tm::snap + Podr-1::gfp];wyIs900=[Plin-32::mCherry::PH+Punc-122::mCherry]	this paper
S3B-C	TV29211	unc-6(ev400); Punc-4::unc-6TM	unc-6(ev400); unc-40(wy1354) wyEx10645; wyIs900	ev400=putative null allele; wy1354=unc-40::gfp::aid; wyEx10645=[Punc-4::unc-6::tm::snap + Pmyo-2::mCherry]; wyIs900=[Plin-32::mCherry::PH+Punc-122::mCherry]	this paper
S3C	TV27520	unc-6(ev400)	unc-6(ev400); unc-40(wy1354); wyIs900	ev400=putative null allele; wy1354=unc-40::gfp::aid; wyIs900=[Plin-32::mCherry::PH+Punc-122::mCherry]	this paper
S3D	TV30326	Pmec-7::unc-6TM	unc-40(wy1354) wyEx10439; wyIs900	wy1354=unc-40::gfp::aid; wyEx10439=[Pmec-7::unc-6::tm::snap + Podr-1::gfp];wyIs900=[Plin-32::mCherry::PH+Punc-122::mCherry]	this paper
S3D	TV30397	Punc-4::unc-6TM	unc-40(wy1354) wyEx10645; wyIs900	wy1354=unc-40::gfp::aid; wyEx10645=[Punc-4::unc-6::tm::snap + Pmyo-2::mCherry]; wyIs900=[Plin-32::mCherry::PH+Punc-122::mCherry]	this paper
S3E-F	TV27240	wildtype	unc-40(wy1354); wyIs918	wy1354=unc-40::gfp::aid; wyIs918=[Punc-86::mCherry::PLCdeltaPH+Podr-1::GFP]	this paper
S3E-F	TV28682	unc-6(ev400); Pmec-7::unc-6TM	unc-6(ev400); unc-40(wy1354) wyEx10368; wyIs918	ev400=putative null allele; wy1354=unc-40::gfp::aid; wyEx10368=[Pmec-7::unc-6::tm::snap + Pmyo-2::mCherry]; wyIs918=[Punc-86::mCherry::PLCdeltaPH+Podr-1::GFP]	this paper
S3E-F	TV28725	unc-6(ev400); Punc-4::unc-6TM	unc-6(ev400); unc-40(wy1354) wyEx10645; wyIs918	ev400=putative null allele; wy1354=unc-40::gfp::aid; wyEx10645=[Punc-4::unc-6::tm::snap + Pmyo-2::mCherry]; wyIs918=[Punc-86::mCherry::PLCdeltaPH+Podr-1::GFP]	this paper
S3E-F	TV29057	unc-6(ev400)	unc-6(ev400); unc-40(wy1354); wyIs918	ev400=putative null allele; wy1354=unc-40::gfp::aid; wyIs918=[Punc-86::mCherry::PLCdeltaPH+Podr-1::GFP]	this paper
Figure S4	Strain	Labeled as	Genotype	Descriptions	Reference
S4	TV29955	HSN	glo-1(zu391); wyIs918	zu391=null allele; wyIs918=[Punc-86::mCherry::PLCdeltaPH+Podr-1::GFP]	this paper
S4	TV29556	PDE, PVM	glo-1(wy2022); wyIs900	wy2022=null allele wyIs900=[Plin-32::mCherry::PH+Punc-122::mCherry]	this paper
